# Supplementary material
Source: publisher site journal article supplement (https://www.dovepress.com/article/356038)
Supplement: Supplementary file 1 [file get_supplementary_file.php]

**Supplementary materials**


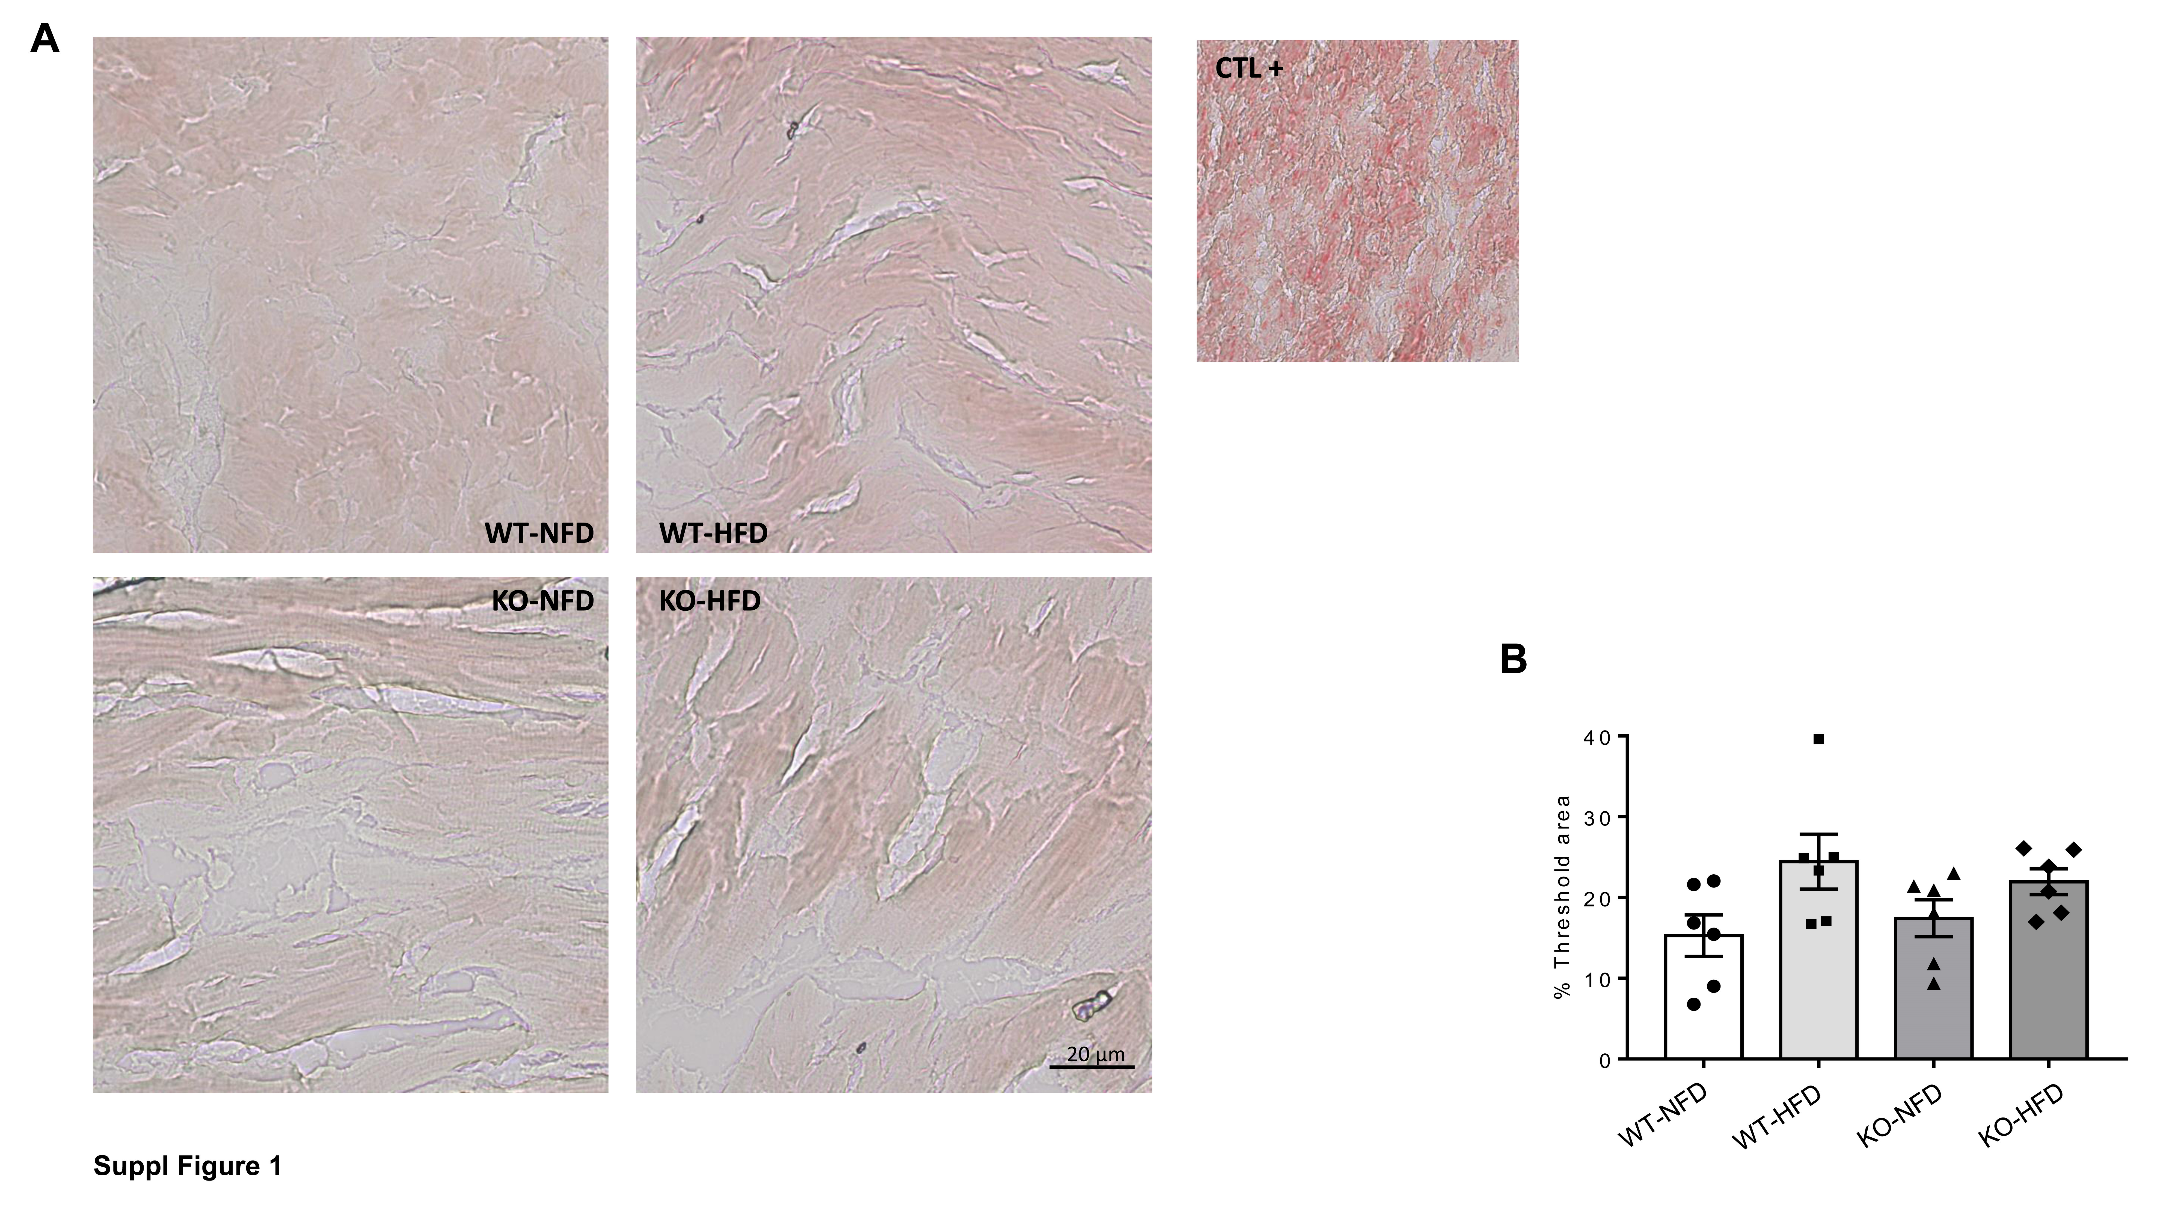


**Supplementary Figure 1** **A)** Representative images of Oil Red O staining for cardiac lipid deposition in wild-type mice treated with normal (WT-NFD) or high (WT-HFD) fat diet, or P2X7 purinergic receptor (P2X7R) knockout mice treated with normal (KO-NFD) or high fat diet (KO-HFD). A positive control (db/db mice treated with HFD, CTL+) is also shown. Magnification: x40. Scale bar: 20µm. **B)** A staining quantification in the four groups of animals is shown. The threshold analysis was performed as described in Materials and Methods section. No significant changes in lipid deposition levels were observed among the four groups of animals. Data are presented as mean±SE for at least six animals in each group. Two-way ANOVA with genotype and diet as sources of variation, followed by Tukey’s post-hoc test, was used for multiple comparisons. Statistical significance was set at p<0.05. ● WT-NFD, ■ WT-HFD, ▲ KO-NFD, ◆ KO-HFD.


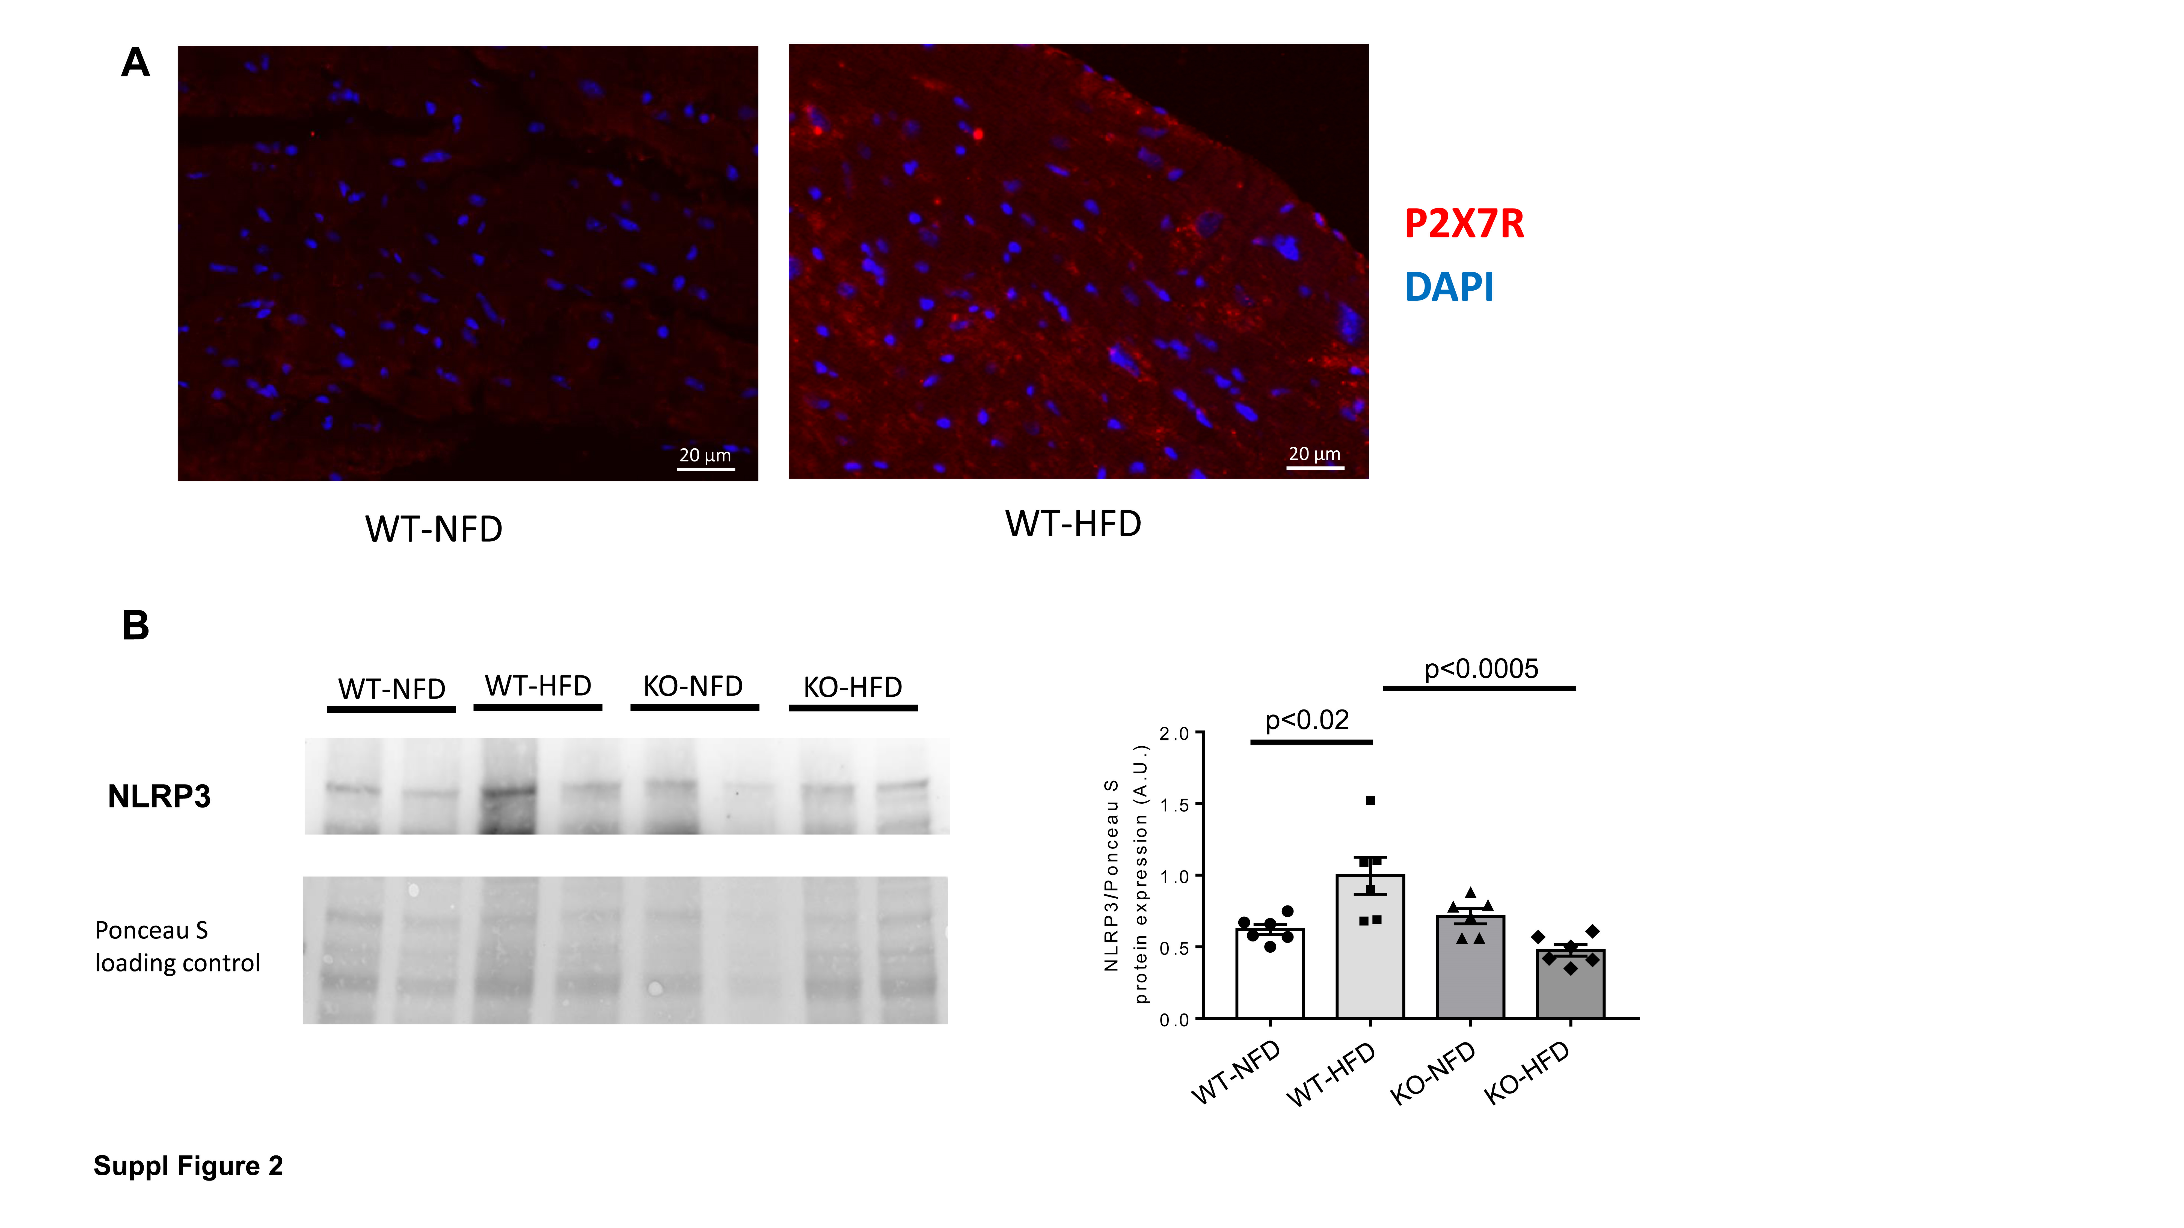


**Supplementary Figure 2** **A)** Representative immunofluorescence images acquired in left ventricle tissue of wild-type mice treated with normal (WT-NFD) or high (WT-HFD) fat diet. Protein expression of P2X7 purinergic receptor (P2X7R), shown in red, increase after high fat diet treatment. 4,6-diamidino2-phenylindole (DAPI), shown in blue, is used as a nuclear marker. Magnification: x40. Scale bars: 20µm. **B)** Representative western blot of NLR family, pyrin domain containing 3(NLRP3) heart protein expression in wild-type mice treated with normal (WT-NFD) or high (WT-HFD) fat diet, or P2X7R knockout mice treated with normal (KO-NFD) or high fat diet (KO-HFD). Results are expressed as arbitrary units (A.U.), which represent the ratio between the intensities of the band of interest and the band corresponding to the Ponceau S staining. High fat diet treatment induces a significant raise in NLRP3 protein levels only in WT mice. Data are presented as mean±SE for at least six animals in each group. Two-way ANOVA with genotype and diet as sources of variation, followed by Tukey’s post-hoc test, was used for multiple comparisons. Statistical significance was set at p<0.05. ● WT-NFD, ■ WT-HFD, ▲ KO-NFD, ◆ KO-HFD.

**Supplementary Table 1:** List of TaqMan® Assays used to determine gene expression levels.

| **Assay ID** | **Assay symbol** | **Gene name** |
| --- | --- | --- |
| Mm01205647_g1 | ACTB | actin-b |
| Mm00802529_m1 | ADGRE1 | adhesion G protein-coupled receptor E1 |
| Mm00438023_m1 | CASP-1 | caspase-1 |
| Mm00441242_m1 | MCP-1 | monocyte chemotactic protein-1 |
| Mm00483888_m1 | COL1A2 | collagen, type I, alpha 2 |
| Mm01254476_m1 | COL3A1 | collagen, type III, alpha 1 |
| Mm00516023_m1 | ICAM-1 | intercellular adhesion molecule 1 |
| Mm00434225_m1 | IL-18 | interleukin 18 |
| Mm01336189_m1 | IL-1b | interleukin 1 beta |
| Mm00446190_m1 | IL-6 | interleukin 6 |
| Mm00804740_m1 | LOXL2 | lysyl oxidase-like 2 |
| Mm00442991_m1 | MMP-9 | matrix metallopeptidase 9 |
| Mm00476361_m1 | NFkB | nuclear factor of kappa light polypeptide gene enhancer in B cells 1 |
| Mm00840904_m1 | NLRP3 | NLR family, pyrin domain containing 3 |
| Mm00440502_m1 | NOS-2 | nitric oxide synthase 2, inducible |
| Mm004435217_m1 | NOS-3 | nitric oxide synthase 2, endothelial |
| Mm0117882_m1 | TGFbeta | transforming growth factor, beta 1 |
| Mm00443260_m1 | TNFa | tumor necrosis factor alpha |
| 477888_mir | miR-126 | hsa-miR-126-5p |
| 477952_mir | miR-191 | hsa-miR-191-5p |
| 477860_mir | miR-16 | hsa-miR-16-5p |
| 477975_mir | miR-21 | hsa-miR-21-5p |
| 478270_mir | miR-27b | hsa-miR-27b-3p |
| 478384_mir | miR-27a | hsa-miR-27a-3p |
| 478768_mir | miR-214 | hsa-miR-214-5p |
